# Supplementary material for: Extensive tissue-specific transcriptomic plasticity in maize primary roots upon water deficit
Source: PubMed Central journal article supplement (PMC4753846; doi:10.1093/jxb/erv453), 2015-10-13
Supplement: supp_erv453_Supplementary_data.pdf [file supp_erv453_Supplementary_data.pdf]

# Exceptional tissue-specific transcriptomic plasticity in maize primary roots upon water deficit

Nina Opitz, Caroline Marcon, Anja Paschold, Waqas Ahmed Malik, Andrew Lithio, Ronny Brandt, Hans-Peter Piepho, Dan Nettleton, Frank Hochholdinger

## SUPPLEMENTARY MATERIAL

**Figure S1.** Overview of gene activity patterns and numbers of genes within these patterns.

**Figure S2.** Fc distribution of differentially expressed genes (FDR <1%) in the four root tissues.

**Figure S3.** Distribution of differentially expressed genes (FDR <1%) into major metabolic processes as visualized by Mapman.

**Table S1.** Overview of the sample distribution within the flow cell, biological replication, RNA-Seq output, and mapping results.

|              |      | Inactive | St   | Mz   | Mz, St | Ez   | Ez, St | Ez, Mz | Ez, Mz, St | Co   | Co, St | Co, Mz | Co, Mz, St | Co, Ez | Co, Ez, St | Co, Ez, Mz | Constitutive | Σ     |
|--------------|------|----------|------|------|--------|------|--------|--------|------------|------|--------|--------|------------|--------|------------|------------|--------------|-------|
| C \ WD       | 0000 | 0001     | 0010 | 0011 | 0100   | 0101 | 0110   | 0111   | 1000       | 1001 | 1010   | 1011   | 1100       | 1101   | 1110       | 1111       |              |       |
| Inactive     | 0000 | 2068     | 75   | 47   | 11     | 36   | 4      | 4      | 1          | 114  | 26     | 8      | 10         | 3      | 5          | 3          | 10           | 2425  |
| St           | 0001 | 67       | 362  | 2    | 15     | 3    | 38     | 0      | 4          | 3    | 70     | 3      | 6          | 1      | 20         | 0          | 14           | 608   |
| Mz           | 0010 | 47       | 2    | 312  | 39     | 0    | 0      | 28     | 2          | 3    | 1      | 25     | 8          | 0      | 1          | 8          | 4            | 480   |
| Mz, St       | 0011 | 3        | 14   | 14   | 153    | 0    | 3      | 0      | 25         | 0    | 4      | 3      | 49         | 0      | 1          | 0          | 23           | 292   |
| Ez           | 0100 | 35       | 3    | 3    | 0      | 75   | 5      | 17     | 3          | 0    | 0      | 1      | 0          | 9      | 4          | 3          | 2            | 160   |
| Ez, St       | 0101 | 3        | 9    | 0    | 0      | 1    | 51     | 0      | 13         | 0    | 1      | 0      | 0          | 0      | 22         | 0          | 11           | 111   |
| Ez, Mz       | 0110 | 3        | 0    | 28   | 4      | 5    | 0      | 201    | 31         | 0    | 0      | 2      | 2          | 0      | 0          | 27         | 29           | 332   |
| Ez, Mz, St   | 0111 | 1        | 0    | 2    | 22     | 1    | 7      | 13     | 268        | 0    | 0      | 1      | 14         | 0      | 2          | 5          | 146          | 482   |
| Co           | 1000 | 138      | 13   | 3    | 1      | 5    | 0      | 0      | 1          | 587  | 152    | 22     | 12         | 50     | 38         | 9          | 21           | 1052  |
| Co, St       | 1001 | 10       | 54   | 1    | 1      | 1    | 9      | 1      | 0          | 62   | 799    | 4      | 60         | 4      | 274        | 0          | 99           | 1379  |
| Co, Mz       | 1010 | 4        | 1    | 23   | 1      | 0    | 0      | 1      | 1          | 18   | 3      | 106    | 38         | 2      | 0          | 25         | 14           | 237   |
| Co, Mz, St   | 1011 | 1        | 4    | 2    | 20     | 1    | 0      | 1      | 2          | 1    | 45     | 13     | 398        | 0      | 10         | 4          | 297          | 799   |
| Co, Ez       | 1100 | 6        | 1    | 0    | 0      | 13   | 0      | 4      | 0          | 16   | 5      | 2      | 1          | 147    | 28         | 24         | 12           | 259   |
| Co, Ez, St   | 1101 | 2        | 3    | 0    | 0      | 1    | 16     | 0      | 3          | 6    | 40     | 2      | 8          | 12     | 579        | 1          | 261          | 934   |
| Co, Ez, Mz   | 1110 | 0        | 1    | 5    | 0      | 1    | 0      | 37     | 3          | 2    | 2      | 13     | 6          | 14     | 4          | 291        | 114          | 493   |
| Constitutive | 1111 | 0        | 0    | 1    | 3      | 0    | 3      | 5      | 64         | 1    | 10     | 3      | 86         | 4      | 82         | 38         | 19163        | 19463 |
| Σ            |      | 2388     | 542  | 443  | 270    | 143  | 136    | 312    | 421        | 813  | 1158   | 208    | 698        | 246    | 1070       | 438        | 20220        | 29506 |

**Color code:**

|  |                                                                      |
|--|----------------------------------------------------------------------|
|  | Inactive genes                                                       |
|  | Constitutively active genes                                          |
|  | Stable genes                                                         |
|  | Dynamic genes: spatial increase of gene activity after water deficit |
|  | Dynamic genes: spatial decrease of gene activity after water deficit |
|  | Dynamic genes: spatial change of gene activity after water deficit   |

**Figure S1. Overview of gene activity patterns and numbers of genes within these patterns.** Each cell represents a specific gene activity pattern and states the number of genes displaying this pattern. Each four digit code in first row/column represents gene activity (1) or inactivity (0) across the four tissues, in the order of cortex (Co), Elongation zone (Ez), Meristematic zone (Mz), and Stele (St). The columns indicate activity under water deficit conditions (WD), and the rows indicate activity under control conditions (C). 10,105 genes of the FGS were not considered for the analysis and could be added to the 2,068 inactive genes in the first cell (0000-0000).

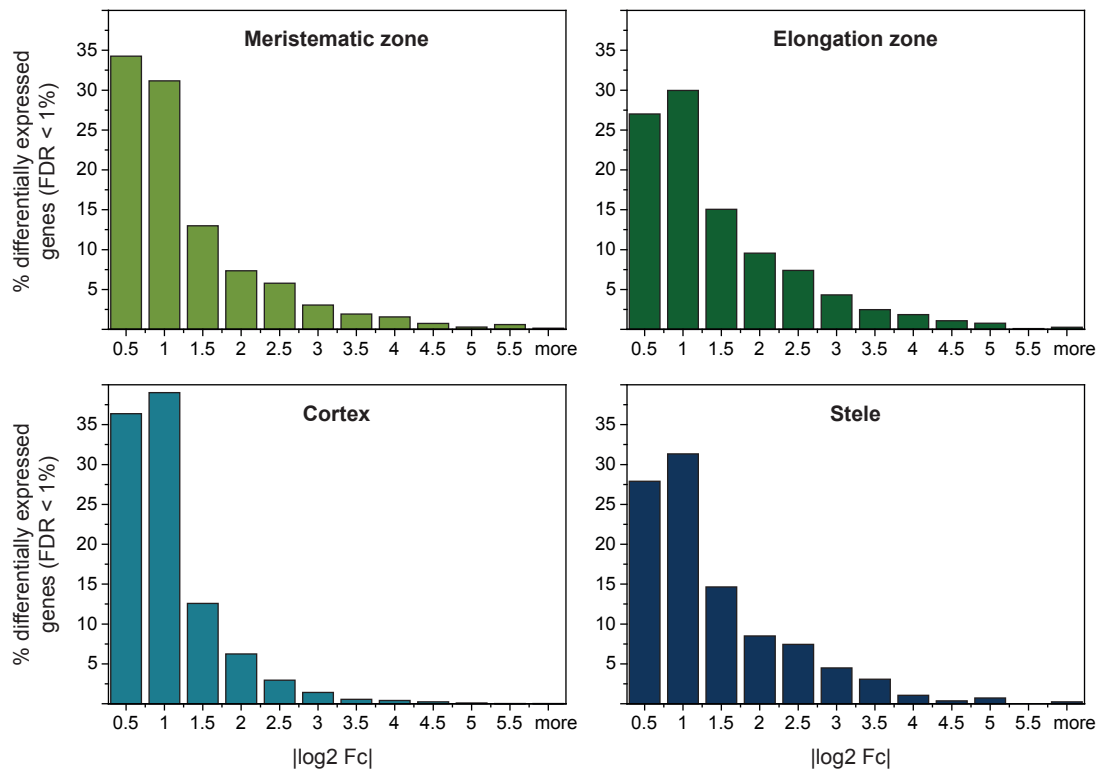

**Figure S2. Fold change distribution of differentially expressed genes (FDR < 1%) in the four root tissues. Bar charts display frequencies of |log2 Fc|.**

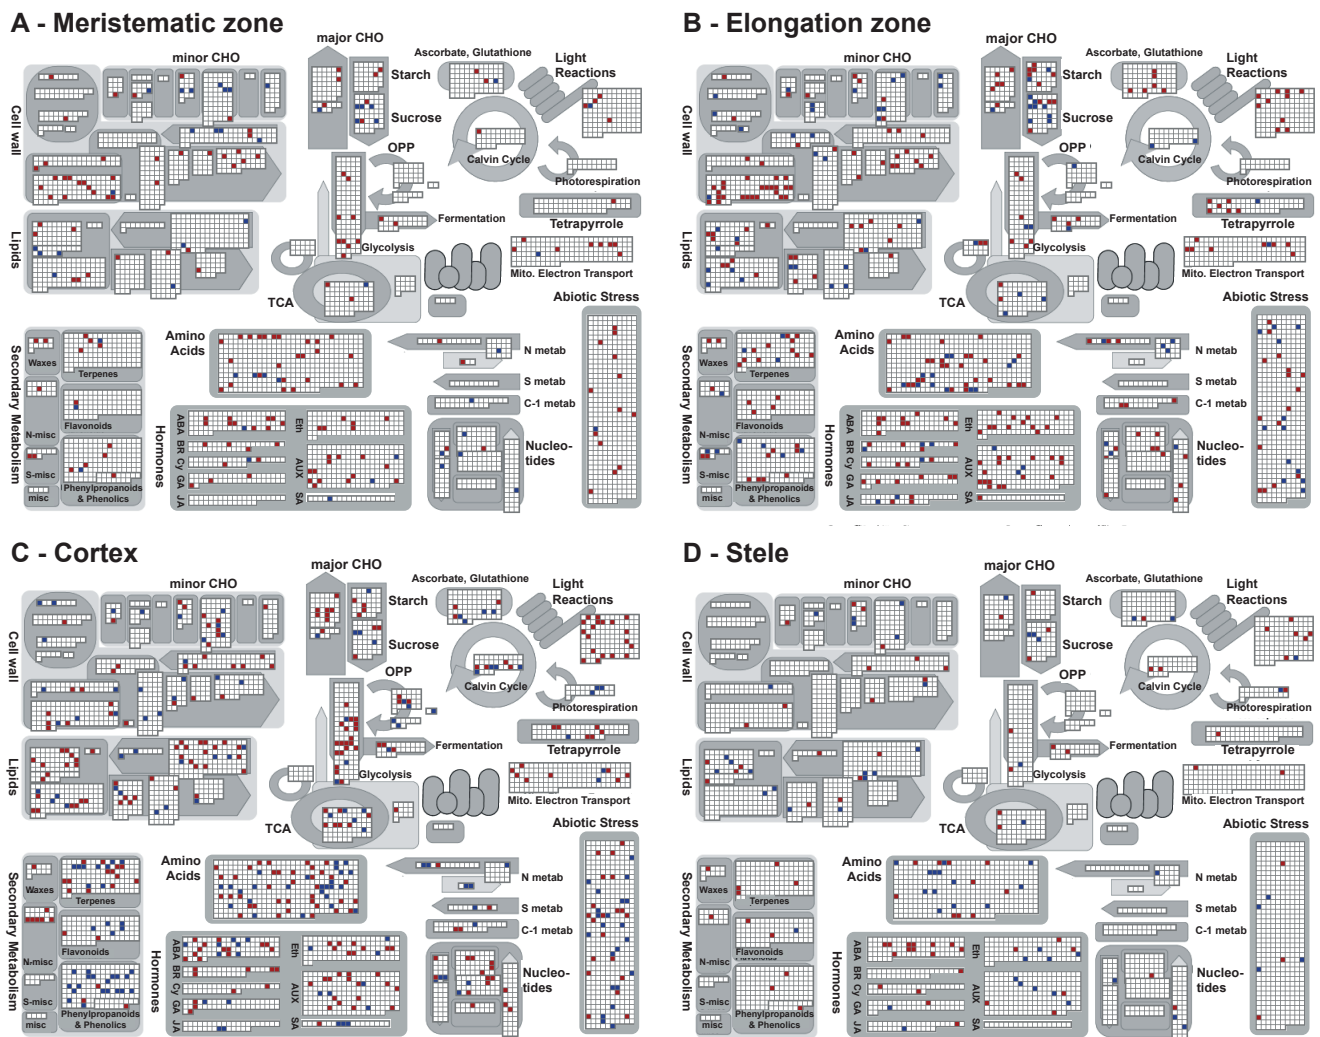

**Figure S3. Distribution of differentially expressed genes (FDR <1%) into major metabolic pathways as visualized by Mapman.** Genes differentially regulated in **A** meristematic zone (1,348 genes corresponding to 1,479 transcript identifiers in Mapman, visible are 203), **B** elongation zone (2,313 genes corresponding to 2,533 transcript identifiers, visible are 371), **C** cortex (2,878 genes corresponding to 3,191 transcript identifiers, visible are 467), and **D** stele (846 genes corresponding to 934 transcript identifiers, visible are 146) are indicated by colored squares in metabolic pathways. Transcripts which were up and down-regulated are represented in red and blue, respectively.

Table S1. Overview of the sample distribution within the flow cell, biological replication, RNA-Seq output, and mapping results.

| Sample            | Replicate     | Illumina indexed adapter | Lane on Flow cell | Number of reads |                                     |                                        |                                                       |                                                           |            |
|-------------------|---------------|--------------------------|-------------------|-----------------|-------------------------------------|----------------------------------------|-------------------------------------------------------|-----------------------------------------------------------|------------|
|                   |               |                          |                   | Total - raw     | Total - after trimming <sup>a</sup> | Uniquely mapped on genome <sup>b</sup> | Uniquely mapped on genome without stacks <sup>c</sup> | Uniquely mapped without stacks mapped on FGS <sup>d</sup> |            |
| Meristematic zone | control       | 1                        | AR004             | 2               | 43,935,848                          | 43,328,679                             | 36,615,084                                            | 16,454,296                                                | 11,774,304 |
|                   |               | 2                        | AR001             | 5               | 64,483,438                          | 63,891,917                             | 53,898,333                                            | 20,300,907                                                | 14,629,290 |
|                   |               | 3                        | AR011             | 7               | 65,719,035                          | 65,208,887                             | 55,437,932                                            | 21,462,063                                                | 15,465,324 |
|                   |               | 4                        | AR021             | 8               | 63,913,747                          | 63,377,558                             | 53,862,565                                            | 21,362,865                                                | 15,312,907 |
|                   | water deficit | 1                        | AR002             | 1               | 57,667,131                          | 57,012,017                             | 48,490,851                                            | 19,805,303                                                | 14,275,159 |
|                   |               | 2                        | AR023             | 6               | 53,699,721                          | 53,300,735                             | 45,610,506                                            | 19,056,195                                                | 13,800,950 |
|                   |               | 3                        | AR020             | 7               | 55,551,383                          | 55,020,060                             | 47,108,626                                            | 20,515,986                                                | 14,912,856 |
|                   |               | 4                        | AR022             | 8               | 47,505,365                          | 46,906,483                             | 39,804,432                                            | 18,259,337                                                | 13,125,390 |
| Elongation zone   | control       | 1                        | AR006             | 2               | 57,750,401                          | 56,899,124                             | 48,822,135                                            | 19,028,651                                                | 13,943,599 |
|                   |               | 2                        | AR015             | 4               | 61,403,097                          | 60,721,818                             | 52,362,271                                            | 18,707,962                                                | 13,712,268 |
|                   |               | 3                        | AR003             | 5               | 44,218,176                          | 43,875,305                             | 37,680,678                                            | 15,313,418                                                | 11,143,297 |
|                   |               | 4                        | AR006             | 8               | 41,871,561                          | 41,415,817                             | 34,418,106                                            | 14,998,969                                                | 10,945,694 |
|                   | water deficit | 1                        | AR019             | 1               | 52,536,520                          | 51,826,997                             | 44,508,242                                            | 18,030,442                                                | 13,228,438 |
|                   |               | 2                        | AR016             | 4               | 39,469,624                          | 38,952,698                             | 33,725,975                                            | 14,729,036                                                | 10,909,534 |
|                   |               | 3                        | AR025             | 6               | 53,039,179                          | 52,503,793                             | 45,304,284                                            | 18,585,944                                                | 13,725,979 |
|                   |               | 4                        | AR003             | 8               | 37,107,904                          | 36,809,273                             | 31,680,483                                            | 14,566,590                                                | 10,606,157 |
| Cortex            | control       | 1                        | AR014             | 2               | 31,066,420                          | 30,340,990                             | 25,786,082                                            | 10,782,034                                                | 8,103,497  |
|                   |               | 2                        | AR018             | 3               | 55,803,028                          | 54,834,652                             | 46,735,625                                            | 12,984,939                                                | 9,725,052  |
|                   |               | 3                        | AR004             | 4               | 51,274,131                          | 50,151,975                             | 42,475,851                                            | 13,053,559                                                | 9,827,509  |
|                   |               | 4                        | AR009             | 5               | 53,213,965                          | 52,455,045                             | 43,721,026                                            | 19,826,704                                                | 14,954,256 |
|                   | water deficit | 1                        | AR009             | 1               | 48,845,423                          | 47,734,152                             | 40,843,592                                            | 19,808,871                                                | 15,017,592 |
|                   |               | 2                        | AR010             | 3               | 62,472,009                          | 60,892,714                             | 52,204,129                                            | 20,632,083                                                | 15,561,221 |
|                   |               | 3                        | AR010             | 4               | 57,200,471                          | 55,770,676                             | 47,939,938                                            | 21,956,496                                                | 16,524,545 |
|                   |               | 4                        | AR018             | 6               | 59,525,450                          | 58,611,583                             | 49,735,045                                            | 20,229,404                                                | 15,320,460 |
| Stele             | control       | 1                        | AR007             | 2               | 26,784,079                          | 26,372,426                             | 22,683,174                                            | 12,979,973                                                | 9,606,068  |
|                   |               | 2                        | AR012             | 3               | 42,876,041                          | 42,403,400                             | 36,434,495                                            | 16,822,490                                                | 12,394,415 |
|                   |               | 3                        | AR019             | 5               | 38,915,010                          | 38,485,887                             | 32,922,830                                            | 15,979,628                                                | 11,817,936 |
|                   |               | 4                        | AR007             | 7               | 37,462,222                          | 37,047,705                             | 31,882,718                                            | 16,883,856                                                | 12,563,058 |
|                   | water deficit | 1                        | AR005             | 1               | 35,755,113                          | 35,254,511                             | 30,227,199                                            | 16,333,753                                                | 12,133,667 |
|                   |               | 2                        | AR013             | 3               | 49,915,834                          | 49,400,895                             | 41,818,382                                            | 9,069,461                                                 | 6,729,209  |
|                   |               | 3                        | AR027             | 6               | 38,663,739                          | 38,241,982                             | 32,574,303                                            | 16,994,357                                                | 12,589,227 |
|                   |               | 4                        | AR005             | 7               | 38,724,461                          | 38,301,754                             | 32,863,824                                            | 17,502,500                                                | 12,977,239 |

<sup>a</sup> Quality trimming removed low quality and ambiguous nucleotides of sequence ends and adapter contamination

<sup>b</sup> Mapped to the reference genome of B73 (Schnable *et al.*, 2009)

<sup>c</sup> After removal of stacked reads i.e. redundant reads sharing the same start and end coordinate, sequencing direction, and sequence

<sup>d</sup> Mapped to the gene models of the "filtered gene set" (FGS) of *Zea mays* (Release 5.b)
